# 1 Intrauterine position probabilities in mice, 2 rats and gerbils

3 John F Mulley<sup>1</sup> and Ludmila I Kuncheva<sup>2</sup>

4 <sup>1</sup>School of Biological Sciences, Bangor University, Deiniol Road, Bangor, Gwynedd  
5 LL57 2UW, United Kingdom

6 <sup>2</sup>School of Computer Science, Bangor University, Dean Street, Bangor, Gwynedd LL57  
7 1UT, United Kingdom

8 Corresponding author:

9 John F Mulley<sup>1</sup>

10 Email address: [j.mulley@bangor.ac.uk](mailto:j.mulley@bangor.ac.uk)

## 11 ABSTRACT

12 The position of a developing embryo or foetus relative to members of the same or opposite sex can have  
13 profound effects on its resulting anatomy, physiology and behavior. Here we treat intrauterine position as  
14 a combinatorial problem and determine the theoretical probability of having 0, 1 or 2 adjacent foetuses  
15 of the opposite sex for species with random and biased distribution of genders in uterine horns (mice  
16 and gerbils), and where the influence of an "upstream" male has been proposed to be a factor (rats). As  
17 overall litter size increases the probabilities of having 0, 1, or 2 adjacent foetuses of the opposite sex  
18 approaches and eventually settles at 0.25, 0.5, 0.25 respectively. However, at biologically-relevant litter  
19 sizes probabilities are more variable and the general effect of an increase in litter size is to increase the  
20 probability that any particular foetus will be flanked by two members of the opposite sex. When gender  
21 ratios within a uterine horn are no longer balanced, the probability that there are 0 adjacent foetuses of  
22 the opposite sex increases.

## 23 INTRODUCTION

24 The position of a developing embryo or foetus relative to others of the same or opposite sex can influence  
25 subsequent anatomy, physiology and behaviour. Such effects have been recognised since antiquity, even  
26 from animals that produce few offspring, such as cows, where intersex "freemartins" are formed when the  
27 placentae of male and female twins establish vascular connections enabling exchange of cellular material,  
28 resulting in chimerism and masculinisation of the reproductive tract of the female (Freeman, 2007; Hunter,  
29 1779; Padula, 2005). In animals which produce large numbers of offspring at one time, the effects can  
30 be profound or nuanced, depending on the position of an embryo relative to members of the same or  
31 opposite sex, and are not the result of chimerism. This intrauterine position effect has been particularly  
32 well studied in rodents, and is caused by the transfer of readily diffusible lipophilic steroid hormones such  
33 as testosterone and estradiol between adjacent embryos (Clemens, 1974; Clemens et al., 1978; Nagel and  
34 vom Saal, 2004; Ryan and Vandenbergh, 2002; Vandenbergh, 2009; vom Saal, 1989; vom Saal et al., 1999,  
35 1983; vom Saal and Bronson, 1980). Embryos located centrally within a horn of the bicornuate rodent  
36 uterus may have 0, 1 or 2 adjacent embryos of the opposite sex, and those in terminal positions (located  
37 adjacent to the cervix or ovary) 0 or 1 (Figure 1). Embryos may therefore be defined as: 2F when they  
38 develop between two females (equivalent to 0M); 2M when they develop between two males (equivalent  
39 to 0F); or 1M/1F when they develop between one neighbour of each sex. Terminal embryos can only be  
40 1M (i.e. 0F) or 1F (0M). The most extreme phenotypic effects are seen for those that develop between  
41 two members of the opposite sex (2F males and 2M females), as these receive the greatest supplement  
42 of additional hormone (Nagel and vom Saal, 2004). 2M females exhibit an extended anogenital region,  
43 delayed puberty, decreased attractiveness, irregular oestrus cycles and decreased reproductive capacity,  
44 and increased aggression compared to 2F females, which have more regular and longer oestrus cycles, are  
45 more sexually attractive and receptive to males, experience earlier puberty, and produce more litters over  
46 their lifetime (Clark and Galef, 1998; McDermott et al., 1978; Nagel and vom Saal, 2004; Quadagno et al.,

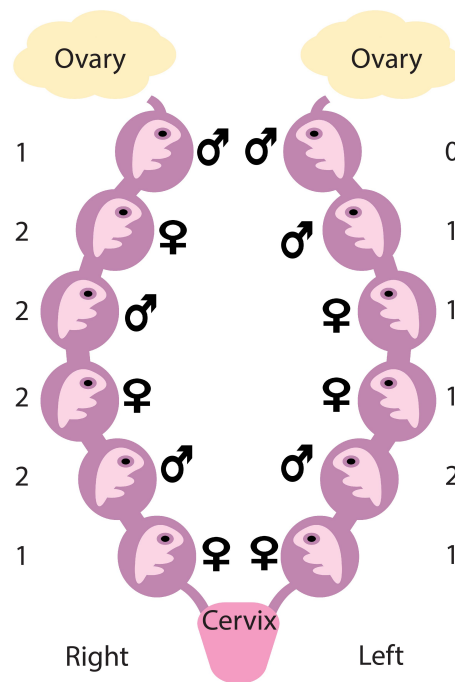

**Figure 1.** Ventral view of a bicornuate reproductive system, showing the left and right uterine horns. In this example, there are 12 fetuses (6 female ♀, 6 male ♂, divided equally between the two horns, and randomly distributed within them). Those in terminal positions (neighbouring the cervix or ovary) may have 0 or 1 adjacent fetuses of the opposite sex, and those in central positions may have 0, 1, or 2. The numbering at the far left and right of the figure highlights the situation for these fetuses.

47 1987; Ryan and Vandenberg, 2002; Vandenberg, 2009; Vandenberg and Huggett, 1995; vom Saal et al.,  
 48 1983; vom Saal, 1989; vom Saal et al., 1999; vom Saal and Bronson, 1980). Furthermore, the intrauterine  
 49 position of a female can influence the sex ratio of her own litters, with 2M females producing litters  
 50 biased towards males, and 2F females producing more female offspring (Clark et al., 1993; Vandenberg,  
 51 1993; Vandenberg and Huggett, 1994). Finally, male embryos that develop between two males (2M/0M  
 52 males) and those that develop between two females (2F/0M) can be considered to be “studs” and “duds”  
 53 respectively, with studs both more attractive to females and more reproductively successful than duds  
 54 (Clark et al., 1992). Imaginary versions of real-world situations are often used as the basis of mathematical  
 55 problems, especially in the field of combinatorial analysis (combinatorics). For example, the ménage  
 56 problem (problème des ménages) considers the number of possible ways to seat  $n$  male-female couples  
 57 at a circular table, such that men and women alternate, and no-one sits next to their partner (Bogart and  
 58 Doyle, 1986; Dutka, 1986). The arrangement of embryos within uterine horns of litter-bearing species is a  
 59 real-world situation that can also be considered as a combinatorial problem (an embryonic dinner party?).

60 Whilst much of the above holds true for all rodents, there are subtle differences in specific lineages,  
 61 such as laboratory rats (*Rattus norvegicus*) and Mongolian gerbils (*Meriones unguiculatus*). In rats, both  
 62 venous and arterial blood flows unidirectionally from the caudal end towards the cephalic end of each  
 63 uterine horn (i.e. cervix to ovary), and so, in addition to effects resulting from testosterone produced by  
 64 immediate neighbours, testosterone produced by male fetuses at the caudal end has been suggested to  
 65 influence “downstream” littermates (Hernandez-Tristan et al., 1999; Meisel and Ward, 1981) (although it  
 66 was subsequently shown that hormones move in both directions (Even et al., 1992; Vom Saal and Dhar,  
 67 1992). In gerbils, there is a biased distribution of male and female fetuses in the uterine horns, with males  
 68 more common in the right horn than the left (Clark and Galef, 1990). There are clearly several factors  
 69 that influence the probability that an embryo will have 0, 1 or 2 neighbours of the opposite sex, including  
 70 overall litter size, the sex ratio of the litter, and the distribution of fetuses in the two uterine horns. In rats,  
 71 we must also consider the presence of at least one male downstream, as a single male located caudally  
 72 can have the same effect as two or more (Meisel and Ward, 1981). Here we use probability arguments and  
 73 combinatorial analysis to determine probabilities of embryos being adjacent to 0, 1 or 2 members of the

74 opposite sex for random (mouse) and biased (gerbil) distribution of embryos in uterine horns, and for the  
75 “upstream male” effect for a variety of biologically-relevant (and impossible) litter sizes.

## 76 RESULTS

### 77 Random and fixed gender approaches

78 We developed two models for determining the probability that any given foetus has 0,1 or 2 adjacent  
79 members of the opposite sex.

#### 80 Case 1: Random gender

81 In this first model, which we call *Case 1: Random gender*, we assume that there is a fixed probability ( $p$ )  
82 that a randomly picked foetus is female. The exact ratio of male:female foetuses in the horn of the uterus  
83 is not fixed. For example, according to this assumption, if there are a total of 6 foetuses in the horn, and  
84 the probability of being female is 0.5, they can all be male or all can be female with a small but non-zero  
85 probability. The total number of foetuses in the horn is denoted by  $K$ . For this model, the probabilities for  
86 0, 1 or 2 neighbours of the opposite sex are:

$$\begin{aligned} \text{0 adjacent foetuses of the opposite sex:} & P(X=0) = \frac{2}{K} (p^2 + (1-p)^2) \\ & + \frac{K-2}{K} (p^3 + (1-p)^3), \\ \text{1 adjacent foetuses of the opposite sex:} & P(X=1) = 2p(1-p), \\ \text{2 adjacent foetuses of the opposite sex:} & P(X=2) = \frac{K-2}{K} p(1-p) \end{aligned}$$

88 The derivation is detailed in the Methods section, Figure 2 illustrates the result for a selection  
89 of values of  $K$ , with balanced sex ratios (i.e.  $p=0.5$ ), and tabulated results are provided in the Sup-  
90 plemental material for  $K$  varying from 2 to 24, and  $p \in \{0.5, 0.45, 0.3\}$ . MATLAB code and an Excel  
91 probability calculator are available at on GitHub (DOI:10.5281/zenodo.838435, [https://github.com/JFMulley/Intrauterine\\_position](https://github.com/JFMulley/Intrauterine_position)). Figure 3 shows the probabilities for  
92 0, 1 and 2 neighbours of the opposite sex as functions of the number of foetuses  $K$ . The sum of the three  
93 probabilities for each value of  $K$  is 1.  
94

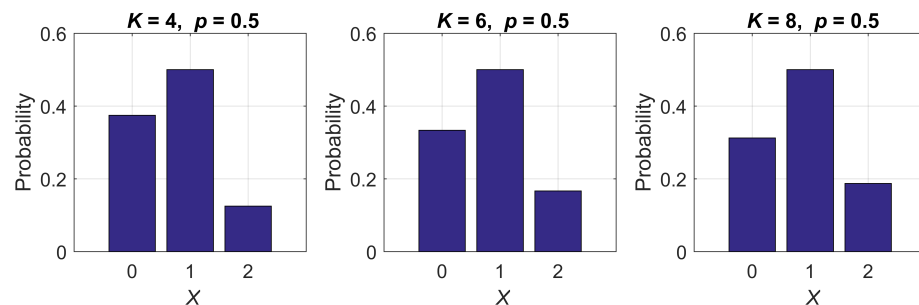

**Figure 2.** Example probability calculations for *Case 1: Random gender*.  $X$  is the number of adjacent foetuses of opposite sex,  $K$  is the number of foetuses in the uterine horn, and  $p$  is the probability that a randomly chosen foetus is female (here set at  $p=0.5$  to reflect a balanced sex ratio).

The probability that there is 1 neighbour of the opposite sex does not depend on the number of foetuses  $K$ , and is always stable at 0.5. The other two probabilities converge asymptotically to the following values:

$$\lim_{K \rightarrow \infty} P(X=0) = p^3 + (1-p)^3, \quad \lim_{K \rightarrow \infty} P(X=2) = p(1-p).$$

95 For  $p = 0.5$  (equal numbers of males and females), these limits are 0.25, 0.5, 0.25 for 0, 1, and 2  
96 adjacent foetuses of the opposite sex, respectively.

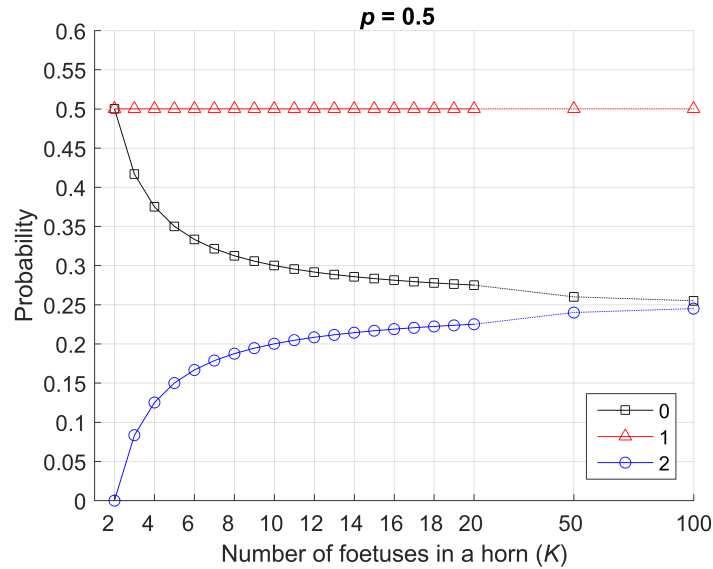

**Figure 3.** Probability of 0, 1 and 2 adjacent foetuses of the opposite sex as a function of the number of foetuses in the uterine horn for *Case 1: Random gender*, with the probability ( $p$ ) that a randomly picked foetus is female set at 0.5 (i.e. a balanced sex ratio). Increasing litter size has no impact on the probability that there is at least one adjacent foetus of the opposite sex, but does increase the probability that a foetus will be flanked by two members of the opposite sex. The asymptotic values are 0.25, 0.5, 0.25 for 0, 1, and 2 adjacent foetuses of the opposite sex, respectively.

### 97 **Case 2: Fixed gender**

98 For the second model, *Case 2: Fixed gender*, we assume that there is a fixed number of female foetuses  
 99 ( $n$ ) among the  $K$  foetuses in the uterine horn. The probabilities for 0, 1 or 2 adjacent foetuses of the  
 100 opposite sex for this model are:

$$\text{0 adjacent foetuses of the opposite sex: } P(X = 0) = \frac{n^2(n-1) + (K-n)^2(K-n-1)}{K^2(K-1)},$$

$$\text{1 adjacent foetuses of the opposite sex: } P(X = 1) = \frac{2n(K-n)}{K(K-1)},$$

$$\text{2 adjacent foetuses of the opposite sex: } P(X = 2) = \frac{n(K-n)(K-2)}{K^2(K-1)}.$$

103 The derivation is detailed in the Methods section as before, Figure 4 depicts similar examples to those  
 104 in Figure 2, and tabulated results are given in the supplementary material.

105 The probability of 0, 1 and 2 adjacent foetuses of the opposite sex as a function of the number of  
 106 foetuses in the uterine horn for *Case 2: Fixed gender* is shown in Figure 5. The number of females was  
 107 taken to be  $K/2$  (*exactly* half, as in a litter with a balanced sex ratio in each uterine horn). There is a  
 108 pronounced difference between the curves in Figures 3 and 5. This can be explained with the different  
 109 assumptions. Take, for example,  $K = 2$  foetuses,  $p = 0.5$  and  $n = K/2$ . In Case 1, the probability of  
 110 having a neighbour of the opposite sex is exactly 0.5. In case 2, however, we *know* that one of the  
 111 foetuses is male, and the other is female. Then the probability of having a neighbour of the opposite sex  
 112 is 1. The dramatic differences between the probability curves highlights the importance of specifying  
 113 the assumptions and the model when quoting probabilities in this context. Asymptotically ( $K \rightarrow \infty$ ),  
 114 both Case 1 and Case 2 converge to the same limit values:  $P(X = 0) = 0.25$ ,  $P(X = 1) = 0.25$ , and  
 115  $P(X = 2) = 0.25$ .

### 116 **Changing the gender ratio**

117 Where gender ratios within the uterine horn are equal, the probabilities of a given foetus being located  
 118 adjacent to 0, 1 or 2 members of the opposite sex settle at 0.25, 0.5 and 0.25 respectively (Figures 3 and

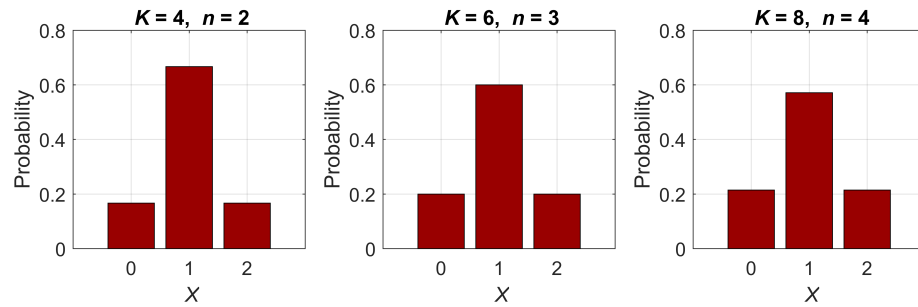

**Figure 4.** Examples of probability calculations for *Case 2: Fixed gender*.  $X$  is the number of adjacent foetuses of the opposite sex,  $K$  is the number of foetuses in the uterine horn, and  $n$  is the number of female foetuses (here set at  $K/2$  to reflect a balanced sex ratio in each uterine horn).

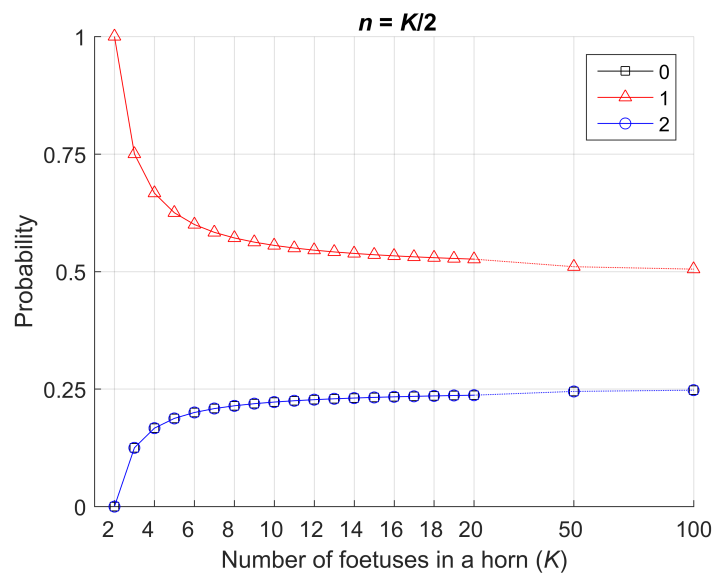

**Figure 5.** Probability of 0, 1 and 2 adjacent foetuses of the opposite sex as a function of the number of foetuses in the uterine horn for *Case 2: Fixed gender*. Here the number of female foetuses  $n$  is set at  $K/2$  to reflect a balanced sex ratio. The asymptotic values are 0.25, 0.5, 0.25 for 0, 1, and 2 adjacent foetuses of the opposite sex, respectively. The curves for 0 and 2 coincide.

119 5). When gender ratios are no longer balanced (as in the gerbil, where male embryos are more common in  
 120 the right horn (Clark and Galef, 1990)), the probability of being adjacent to a member of the opposite sex  
 121 decreases, and the probability of being adjacent to 0 members of the opposite sex increases (Figure 6).  
 122 For Case 1, if  $p = 0.3$ , then the probabilities for 0, 1, and 2 neighbours of the opposite sex would be  
 123 0.37, 0.42, 0.21, respectively.

124 A similar calculation can be performed for Case 2, where the number of foetuses in a uterine horn  
 125  $K$  increases but the number of female foetuses  $n$  is fixed (e.g.  $n=3$ , Figure 7). The graph starts at  $K=3$   
 126 because there are necessarily  $n = 3$  females. At  $K = 6$ , the probabilities are 0.2, 0.6 and 0.2, and from  
 127  $K = 3$  to  $K = 6$ , the probability of having neighbours of the same sex ( $X = 0$ , black dashed line) decreases  
 128 because 3 male foetuses are gradually introduced. From this point onwards, however, the graph goes  
 129 upwards because the population is dominated by males, and the male proportion increases with each  
 130 increment of  $K$ . Consequently, the females will become progressively rarer, and the probability of 1 or 2  
 131 female neighbours will decrease with increasing  $K$ . This example illustrates the asymptotic case where  
 132  $K \rightarrow \infty$ , and  $n$  stays a constant. The probabilities for these asymptotic cases are respectively  $P(X = 0) = 1$ ,  
 133  $P(X = 1) = 0$ , and  $P(X = 2) = 0$ .

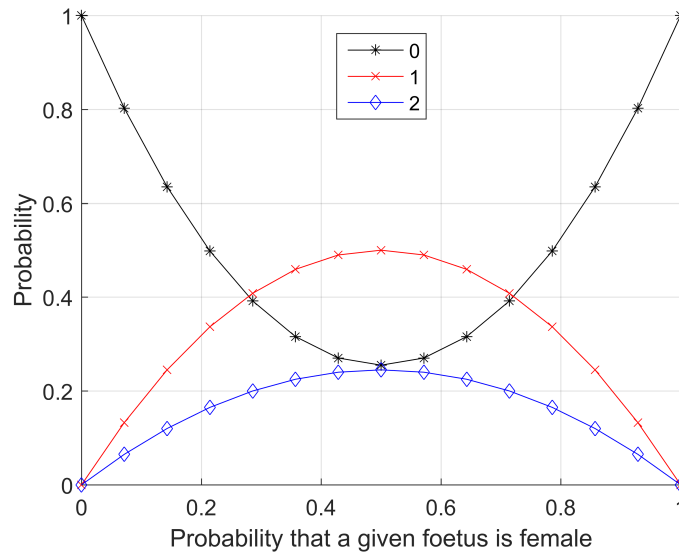

**Figure 6.** Probability of 0, 1 and 2 adjacent foetuses of the opposite sex as a function of the probability of female,  $p$ , calculated from *Case 1: Random gender*. At  $p=0.5$  the sex ratio is equal and the probabilities that a given foetus is adjacent to 0, 1 or 2 members of the opposite sex are 0.25, 0.5 and 0.25 respectively. As sex ratios within the uterine horn become biased towards one sex or the other (i.e. shifts left or right on the x axis), the probability of being adjacent to 1 or 2 members of the opposite sex decreases (and therefore the probability of being adjacent to a member of the same sex increases).

### 134 "Upstream males"

135 The unidirectional (cervix to ovary) flow of blood in the rat uterus adds a further complication, as the  
136 testosterone produced by a single male was suggested to be sufficient to influence all downstream embryos  
137 (Hernandez-Tristan et al., 1999; Meisel and Ward, 1981). Whilst it was subsequently shown that hormone  
138 movement is bidirectional (Even et al., 1992; Vom Saal and Dhar, 1992), the "upstream male" hypothesis  
139 represents an interesting thought experiment, and so we therefore next developed an approach to account  
140 for this. In a uterine horn containing  $K$  foetuses, ordered 1 – 2 – 3 – 4 – ... –  $K$ , and a foetus at position  
141  $y$ , we visualise the probability that there is at least one male at any position between 1 and  $y - 1$  (the  
142 argument is detailed in the Methods section). Figure 8 shows the probability of at least one "upstream"  
143 male as a function of the position of the foetus of interest  $y$ , and  $K = 12$ , for both models. For *Case 1:*  
144 *Random gender*, in a balanced ( $p=0.5$ ) sex ratio, the probability of an upstream male raises to 99% for  
145  $y \geq 8$ , and to above 99.9% for the last position. For *Case 2: Fixed gender*, an upstream male is a certainty  
146 earlier, as soon as  $y$  reaches  $n + 1$ , where  $n$  is the number of females in the uterine horn (Figure 8).

### 147 DISCUSSION

148 After decades of neglect, the importance of sex as a biological variable (SABV) in basic, preclinical and  
149 clinical research is gaining increasing recognition (Clayton and Collins, 2014; Cornelison and Clayton,  
150 2017; Johnson et al., 2009; Miller et al., 2017). For studies using rodents, it will also be important  
151 to consider the impact of intrauterine position on embryonic development and adult morphology and  
152 behavior, and to facilitate this we have provided data, tools and resources for the determination of  
153 intrauterine position probabilities for various litter sizes and sex ratios in several common model species.  
154 Our results and approaches will also be applicable other rodent species, such as spiny mice (*Acomys sp.*,  
155 a model for tissue regeneration (Santos et al., 2016; Seifert et al., 2012)), deer mice (*Peromyscus sp.*,  
156 models for population genetics and adaptation (Weber et al., 2013; Bedford and Hoekstra, 2015; Bendesky  
157 et al., 2017)), sandrats (a model for diet-induced diabetes (Hargreaves et al., 2017; Donath et al., 1999)),  
158 hamsters (Brekke et al., 2016; Brekke and Good, 2014) and degus (*Octodon degus* (Roff et al., 2017;  
159 Correa et al., 2016, 2013)), as well as rabbits (Banszegi et al., 2009) and other mammals.

160 It has been known for several decades that IUP has significant effects on reproductive success, and on

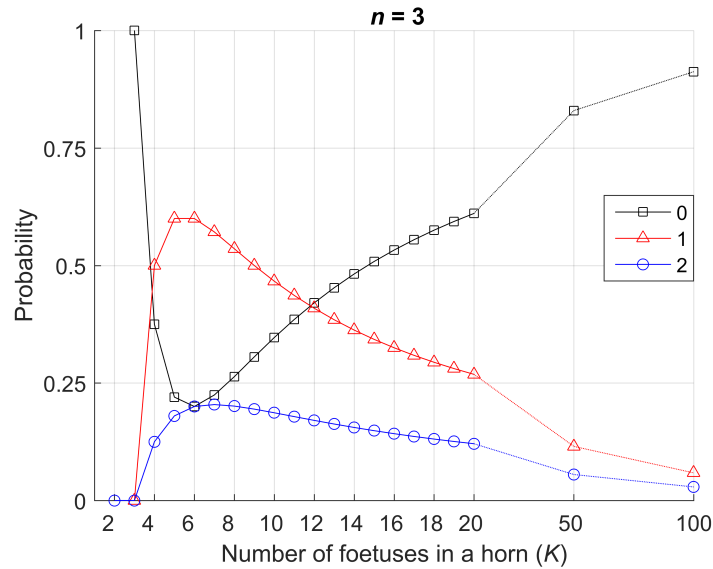

**Figure 7.** Probability of 0, 1 and 2 adjacent foetuses of the opposite sex as a function of the number of foetuses in the uterine horn for *Case 2: Fixed gender* for a constant number of females  $n = 3$ . When  $K$  and  $n$  are equal, all foetuses are female and there is no possibility that an adjacent foetus is a member of the opposite sex. From  $K = 3$  to  $K = 6$ , the probability of having neighbours of the same sex decreases. At  $K=6$  the sex ratio within the uterine horn is balanced, but since  $n$  is fixed, all subsequent additions are male, and at values of  $K > 6$  a male bias develops.

161 sex ratios in subsequent generations (Clemens et al., 1978; Vandenberg, 2009; Ryan and Vandenberg,  
 162 2002). We should therefore be extremely careful when using generalisations regarding "males" and  
 163 "females", as clearly not all members of these categories are equal. Such considerations may be useful in  
 164 the field of sex allocation and sex ratio theory, where much effort has been expended on the evolutionary  
 165 and adaptive significance of alterations from a 1:1 ratio of males and females, especially with respect to  
 166 sociality and altruism (West et al., 2000, 2002; West and Sheldon, 2002; Wild and West, 2007; Charnov,  
 167 1981; Fisher, 1930). In social species such as gerbils, IUP may be the determining factor in assigning  
 168 roles at the nest, with asexual 2F "dud" males equivalent to a cadre of sterile helpers (Clark and Galef,  
 169 2000; Downing et al., 2017) and aggressive, highly sexual 2M "stud" males important for securing  
 170 territory, and for dispersal. 2F females reach puberty at an earlier age, are more attractive to males, and  
 171 produce more litters over their lifetime than 2M females (vom Saal et al., 1999; Ryan and Vandenberg,  
 172 2002; Nagel and vom Saal, 2004). The biased distribution of males and female foetuses in the uterine  
 173 horns of gerbils results in a decrease in the the number of foetuses that develop adjacent to a member of  
 174 the opposite sex (Figure 6 and Figure 7), and so will produce a greater proportion of stud (2M) males  
 175 and "super-mother" (2F) females. Whilst some probability values have been reported in the literature  
 176 previously (e.g. (Nagel and vom Saal, 2004; vom Saal, 1981; Clark and Galef, 1990; vom Saal and  
 177 Bronson, 1980; vom Saal, 1989; Clark et al., 1991)), to our knowledge there have been no previous  
 178 attempts to quantify the probability that there is at least one upstream male (Figure 8). For the IUP  
 179 probabilities reported previously, the approach and underlying assumptions used to generate these values  
 180 have not been provided. As we have shown, different assumptions can generate quite different results - for  
 181 example, when there are six foetuses in a uterine horn and three of these *must* be female (as in our *Case 2:*  
 182 *Fixed gender*), the probabilities of any foetus having 0, 1, or 2 adjacent foetuses of the opposite sex are  
 183 0.2, 0.6 and 0.2 respectively (Figure 4 and Supplemental Table 2). However, when there are 6 foetuses in  
 184 the horn and the probability that any one of these is female =0.5 (i.e. theoretically, the gender ratio within  
 185 the uterine horn is balanced), the values are 0.333, 0.5 and 0.1667 (Figure 2 and Supplemental Table 1).  
 186 The situation is further complicated by seemingly impossible values that have been claimed, such as the  
 187 1/6, 3/6 and 1/6 for 2M, 1M and 0M respectively in a litter of 12 pups reported by (Nagel and vom Saal,  
 188 2004), and the 0.2, 0.65, 0.15 values given by (Hotchkiss and Vandenberg, 2005), which cites (vom Saal,  
 189 1981) as a source. However, the actual values given in (vom Saal, 1981) equate to our asymptotic values

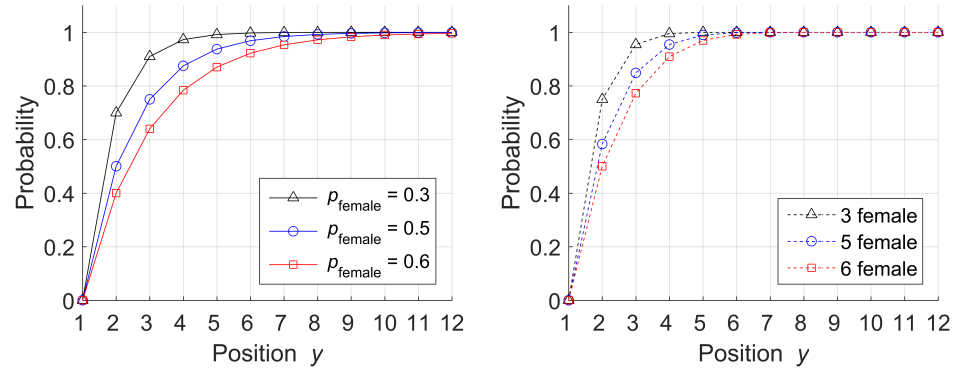

**Figure 8.** Probability of at least one “upstream male”. for *Case 1: Random gender* (left), and *Case 2: Fixed gender* (right) for  $K = 12$  foetuses in a horn.  $y$  is the position of the foetus of interest.

190 of 0.25, 0.5 and 0.25. We have been unable to replicate either of these sets of values under any conditions.  
 191 Hopefully then, our detailed analysis under various assumptions will go some way to providing clarity  
 192 in the field, and facilitate the incorporation of intrauterine position as a biological variable in scientific  
 193 research.

## 194 CONCLUSIONS

195 The underlying assumptions regarding whether there are a fixed number of males and females (as in our  
 196 *Case 2: Fixed gender*), or merely a predetermined probability of a given foetus being a particular sex (as  
 197 in our *Case 1: Random gender*) can have dramatic effects on intrauterine position probabilities. However,  
 198 in both cases the asymptotic values are 0.25, 0.5 and 0.25 for the probabilities that there are 0, 1 or 2  
 199 adjacent foetuses of the opposite sex. The biased distribution of embryos in the uterine horns of gerbils  
 200 leads to a decrease in the probability that a foetus will be adjacent to a member of the opposite sex, and so  
 201 increases the probability of same-sex neighbours.

## 202 METHODS

203 This section details the derivations of the results. We will be using the following notations:

- $t$ : gender of the embryo of interest,  $t \in \{F, M\}$
- $v, w$ : genders of the neighbours of the embryo of interest
- 204  $p$ : probability that a randomly chosen embryo is female  $P(t = F)$ ; hence  $P(t = M) = 1 - p$
- $K$ : number of embryos in the horn of the womb (arranged as  $1 - 2 - 3 - 4 - \dots - K$ )
- $X$ : a random variable denoting the number of neighbours of opposite sex;  $X \in \{0, 1, 2\}$ .

### 205 Derivation of Case 1: Random gender

Here we assume that there are  $K$  embryos in the horn of the womb, and their gender is not known in advance. Any given embryo could be male or female, which is governed by a fixed probability  $p$ . The task is to find the probability mass function of  $X$ . Denote by  $SP$  the special cases where we pick embryo 1 or embryo  $K$ , both of whom have only one neighbour. The remaining  $K - 2$  embryos have 2 neighbours each. Then

$$P(SP) = \frac{2}{K} \quad \text{and} \quad P(\sim SP) = \frac{K-2}{K},$$

where  $\sim$  denotes the opposite event. The three values of  $P(X)$  can be calculated separately as follows:

$$P(X = 0) = P(X = 0, SP) + P(X = 0, \sim SP) = P(X = 0|SP) \frac{2}{K} + P(X = 0|\sim SP) \frac{K-2}{K}.$$

Taking into account the assumption that the genders do not depend on the position of the embryo, the conditional probabilities are respectively:

$$P(X = 0|SP) = P(t = F, v = F) + P(t = M, v = M) = p^2 + (1 - p)^2$$



and

$$P(X = 0 | \sim SP) = P(t = F, v = F, w = F) + P(t = M, v = M, w = M) = p^3 + (1 - p)^3.$$

Then

$$\boxed{P(X=0)} = \frac{2}{K} (p^2 + (1 - p)^2) + \frac{K-2}{K} (p^3 + (1 - p)^3). \quad (1)$$

Next we can calculate  $P(X = 2)$ :

$$P(X = 2) = P(X = 2, SP) + P(X = 2, \sim SP) = \underbrace{P(X = 2 | SP)}_0 \frac{2}{K} + P(X = 2 | \sim SP) \frac{K-2}{K}.$$

The first conditional probability is 0 because there cannot be two neighbours of different gender for the embryos at the end positions. For the other conditional probability,

$$P(X = 2 | \sim SP) = P(t = F, v = M, w = M) + P(t = M, v = F, w = F) = p(1 - p)^2 + p^2(1 - p) = p(1 - p).$$

Hence,

$$\boxed{P(X=2)} = \frac{K-2}{K} p(1 - p). \quad (2)$$

Finally,

$$P(X = 1) = P(X = 1, SP) + P(X = 1, \sim SP) = P(X = 1 | SP) \frac{2}{K} + P(X = 1 | \sim SP) \frac{K-2}{K}.$$

For this case,

$$P(X = 1 | SP) = P(t = F, v = M) + P(t = M, v = F) = 2p(1 - p),$$

and

$$\begin{aligned} P(X = 1 | \sim SP) &= P(t = F, v = F, w = M) + P(t = F, v = M, w = F) \\ &+ P(t = M, v = F, w = M) + P(t = M, v = M, w = F) \\ &= 2p^2(1 - p) + 2p(1 - p)^2 = 2p(1 - p). \end{aligned}$$

Noticing that the two conditional probabilities are identical,

$$\boxed{P(X=1)} = 2p(1 - p). \quad (3)$$

Putting the probability mass function of  $X$  together, the probability that the number of neighbours of different gender for a randomly chosen embryo is:

$$P(X) = \begin{cases} \frac{2}{K} (p^2 + (1 - p)^2) + \frac{K-2}{K} (p^3 + (1 - p)^3), & X = 0, \\ 2p(1 - p), & X = 1, \\ \frac{K-2}{K} p(1 - p), & X = 2. \end{cases} \quad (4)$$

#### 206 Derivation of Case 2: Fixed gender

207 This time, the genders are fixed and the  $K$  embryos are arranged in random order. There are exactly  $n$   
208 female embryos and  $K - n$  male embryos. The notations and the task are the same as in the previous case.

Again,

$$P(X = 0) = P(X = 0, SP) + P(X = 0, \sim SP) = P(X = 0 | SP) \frac{2}{K} + P(X = 0 | \sim SP) \frac{K-2}{K}.$$

This time, however, the conditional probabilities are different:

$$P(X = 0 | SP) = P(t = F, v = F) + P(t = M, v = M) = \frac{n(n-1)}{K(K-1)} + \frac{(K-n)(K-n-1)}{K(K-1)}$$

and

$$\begin{aligned} P(X = 0 | \sim SP) &= P(t = F, v = F, w = F) + P(t = M, v = M, w = M) \\ &= \frac{n(n-1)(n-2)}{K(K-1)(K-2)} + \frac{(K-n)(K-n-1)(K-n-2)}{K(K-1)(K-2)}. \end{aligned}$$

Then, after simple algebraic manipulations,

$$\boxed{P(X=0)} = \frac{n^2(n-1) + (K-n)^2(K-n-1)}{K^2(K-1)}. \quad (5)$$

Similarly,

$$P(X = 2) = \underbrace{P(X = 2 | SP)}_0 \frac{2}{K} + P(X = 2 | \sim SP) \frac{K-2}{K}.$$

and

$$\begin{aligned} P(X = 2 | \sim SP) &= P(t = F, v = M, w = M) + P(t = M, v = F, w = F) \\ &= \frac{n(K-n)(K-n-1)}{K(K-1)(K-2)} + \frac{(K-n)n(n-1)}{K(K-1)(K-2)} = \frac{n(K-n)}{K(K-1)}. \end{aligned}$$

Then

$$\boxed{P(X=2)} = \frac{n(K-n)(K-2)}{K^2(K-1)}. \quad (6)$$

Finally,

$$P(X = 1) = P(X = 1, SP) + P(X = 1, \sim SP) = P(X = 1 | SP) \frac{2}{K} + P(X = 1 | \sim SP) \frac{K-2}{K}.$$

$$P(X = 1 | SP) = P(t = F, v = M) + P(t = M, v = F) = \frac{2n(K-n)}{K(K-1)},$$

and

$$\begin{aligned} P(X = 1 | \sim SP) &= P(t = F, v = F, w = M) + P(t = F, v = M, w = F) \\ &\quad + P(t = M, v = F, w = M) + P(t = M, v = M, w = F) \\ &= \frac{2(n(n-1)(K-n) + n(K-n)(K-n-1))}{K(K-1)(K-2)} = \frac{2n(K-n)}{K(K-1)}. \end{aligned}$$

Again,

$$\boxed{P(X=1)} = \frac{2n(K-n)}{K(K-1)}. \quad (7)$$

Putting equations (5), (6), and (7) together, the probability that the number of neighbours of different gender for a randomly chosen embryo is:

$$P(X) = \begin{cases} \frac{n^2(n-1) + (K-n)^2(K-n-1)}{K^2(K-1)}, & X = 0, \\ \frac{2n(K-n)}{K(K-1)}, & X = 1, \\ \frac{n(K-n)(K-2)}{K^2(K-1)}, & X = 2. \end{cases} \quad (8)$$

## 209 Derivation of the probability of “upstream males”

210 Here we seek to answer theoretically the question: “What is the probability that an foetus at position  $y$  is  
211 preceded by at least one male foetus?”

In Case 1 (Random gender), the question should be phrased more precisely as: “Given the number of foetuses in the horn ( $K$ ), and the probability of female ( $p$ ), what is the probability that a foetus at position  $y$  is preceded by at least one male foetus?” Denote this probability by  $P_M(y|K, p)$ .  $y$  is a random variable taking values in the set  $\{1, 2, \dots, K\}$ . The probability of at least one male out of  $y - 1$  independent Bernoulli trials is

$$P_M(y|K, p) = 1 - p^{(y-1)}.$$

In Case 2 (Fixed gender), the question should be phrased as: “Given the number of foetuses in the horn ( $K$ ), and the number of female foetuses ( $n$ ), what is the probability that a foetus at position  $y$  is preceded by at least one male foetus?” Denote this probability by  $P_M(y|K, n)$ . Clearly,  $P_M(y|K, n) = 1$  for any  $y > n + 1$  because there can only be  $n$  female foetuses among the first  $y - 1$ , the remaining  $y - 1 - n$  foetuses must therefore be male. When  $y \leq n + 1$ , the probability of having at least one male foetus among the  $y - 1$  foetuses is the opposite of the probability of all  $y - 1$  foetuses being female. This probability can be calculated as the ratio of the number of combinations of  $y - 1$  out of  $n$  and the number of all combinations of  $y - 1$  out of  $K$ . Then the probability of at least one male out of  $y - 1$  independent trials is

$$P_M(y|K, n) = \begin{cases} 1, & \text{for } y > n + 1, \\ 1 - \frac{\binom{n}{y-1}}{\binom{K}{y-1}}, & \text{for } y \leq n + 1. \end{cases}$$

## 212 Resources

213 The associated MATLAB code and an Excel format probability calculator are available on GitHub (DOI :  
214 10.5281/zenodo.838435, [https://github.com/JFMulley/Intrauterine\\_position](https://github.com/JFMulley/Intrauterine_position)).  
215 Tabulated results for various values of  $p$  and  $n$  are provided in the Supplemental material.

## 216 ACKNOWLEDGMENTS

217 JFMs work on rodents is funded by a Leverhulme Trust Research Project Grant (RPG-2015-450).

## 218 REFERENCES

- 219 Banszegi, O., Altbacker, V., and Bilko, A. (2009). Intrauterine position influences anatomy and behavior  
220 in domestic rabbits. *Physiology & Behavior*, 98(3):258–262.
- 221 Bedford, N. L. and Hoekstra, H. E. (2015). *Peromyscus* mice as a model for studying natural variation.  
222 *eLife*, 4:e06813.
- 223 Bendesky, A., Kwon, Y.-M., Lassance, J.-M., Lewarch, C. L., Yao, S., Peterson, B. K., He, M. X., Dulac,  
224 C., and Hoekstra, H. E. (2017). The genetic basis of parental care evolution in monogamous mice.  
225 *Nature*, 544(7651):434–439.
- 226 Bogart, K. P. and Doyle, P. G. (1986). Non-Sexist Solution of the Menage Problem. *The American*  
227 *Mathematical Monthly*, 93(7):514.
- 228 Brekke, T. D. and Good, J. M. (2014). Parent-of-origin growth effects and the evolution of hybrid  
229 inviability in dwarf hamsters. *Evolution*, 68(11):3134–3148.
- 230 Brekke, T. D., Henry, L. A., and Good, J. M. (2016). Genomic imprinting, disrupted placental expression,  
231 and speciation. *Evolution*, 70(12):2690–2703.
- 232 Charnov, E. L. (1981). The theory of sex allocation. *Monographs in Population Biology*, 18:1–355.
- 233 Clark, M. and Galef, B. (2000). Why some male Mongolian gerbils may help at the nest: testosterone,  
234 asexuality and alloparenting. *Animal Behaviour*, 59(4):801–806.
- 235 Clark, M. M. and Galef, B. G. (1990). Sexual segregation in the left and right horns of the gerbil uterus:  
236 “The male embryo is usually on the right, the female on the left” (Hippocrates). *Developmental*  
237 *Psychobiology*, 23(1):29–37.
- 238 Clark, M. M. and Galef, B. G. (1998). Effects of intrauterine position on the behavior and genital  
239 morphology of litter-bearing rodents. *Developmental Neuropsychology*, 14(213):197–211.

- 240 Clark, M. M., Galef, B. G., and vom Saal, F. S. (1991). Nonrandom sex composition of gerbil, mouse,  
241 and hamster litters before and after birth. *Developmental Psychobiology*, 24(2):81–90.
- 242 Clark, M. M., Karpiuk, P., and Galef, B. G. (1993). Hormonally mediated inheritance of acquired  
243 characteristics in Mongolian gerbils. *Nature*, 364(6439):712.
- 244 Clark, M. M., Tucker, L., and Galef, B. G. (1992). Stud males and dud males: intra-uterine position  
245 effects on the reproductive success of male gerbils. *Animal Behaviour*, 43(2):215–221.
- 246 Clayton, J. A. and Collins, F. S. (2014). NIH to balance sex in cell and animal studies. *Nature*,  
247 509(7500):282–283.
- 248 Clemens, L. G. (1974). Neurohormonal control of male sexual behavior. In *Reproductive Behavior*, pages  
249 23–53. Springer.
- 250 Clemens, L. G., Gladue, B. A., and Coniglio, L. P. (1978). Prenatal endogenous androgenic influences on  
251 masculine sexual behavior and genital morphology in male and female rats. *Hormones and Behavior*,  
252 10(1):40–53.
- 253 Cornelison, T. L. and Clayton, J. A. (2017). Considering Sex as a Biological Variable in Biomedical  
254 Research. *Gender and the Genome*, 1(2):89–93.
- 255 Correa, L. A., Frugone, M. J., and Soto-Gamboa, M. (2013). Social dominance and behavioral conse-  
256 quences of intrauterine position in female groups of the social rodent *Octodon degus*. *Physiology and*  
257 *Behavior*, 119:161–167.
- 258 Correa, L. A., León, C., Ramírez-Estrada, J., Soto-Gamboa, M., Sepúlveda, R. D., and Ebensperger, L. A.  
259 (2016). Masculinized females produce heavier offspring in a group living rodent. *Journal of Animal*  
260 *Ecology*, 85(6):1552–1562.
- 261 Donath, M. Y., Gross, D. J., Cerasi, E., and Kaiser, N. (1999). Hyperglycemia-induced beta-cell apoptosis  
262 in pancreatic islets of *Psammomys obesus* during development of diabetes. *Diabetes*, 48(4):738–744.
- 263 Downing, P. A., Cornwallis, C. K., and Griffin, A. S. (2017). How to make a sterile helper. *BioEssays*,  
264 39(1):e201600136.
- 265 Dutka, J. (1986). On the Problème des Ménages. *The Mathematical Intelligencer*, 8(3):18–25.
- 266 Even, M. D., Dhar, M. G., and vom Saal, F. S. (1992). Transport of steroids between fetuses via amniotic  
267 fluid in relation to the intrauterine position phenomenon in rats. *Journal of Reproduction and Fertility*,  
268 96(2):709–16.
- 269 Fisher, R. A. (1930). *The Genetical Theory of Natural Selection*. Oxford University Press.
- 270 Freeman, G. (2007). Explaining the freemartin: Tandler and Keller vs. Lillie and the question of priority.  
271 *Journal of Experimental Zoology Part B: Molecular and Developmental Evolution*, 308(2):105–112.
- 272 Hargreaves, A. D., Zhou, L., Christensen, J., Marlétaz, F., Liu, S., Li, F., Jansen, P. G., Spiga, E.,  
273 Hansen, M. T., and Pedersen, S. V. H. (2017). Genome sequence of a diabetes-prone rodent reveals a  
274 mutation hotspot around the ParaHox gene cluster. *Proceedings of the National Academy of Sciences*,  
275 114(29):7677–7682.
- 276 Hernandez-Tristan, R., Arevalo, C., and Canals, S. (1999). Effect of prenatal uterine position on male and  
277 female rats sexual behavior. *Physiology and Behavior*, 67(3):401–408.
- 278 Hotchkiss, A. K. and Vandenberg, J. G. (2005). The anogenital distance index of mice (*Mus musculus*  
279 *domesticus*): an analysis. *Journal of the American Association for Laboratory Animal Science*,  
280 44(4):46–48.
- 281 Hunter, J. (1779). Account of the Free Martin. By Mr. John Hunter, F. R. S. *Philosophical Transactions*  
282 *of the Royal Society of London*, 69:279–293.
- 283 Johnson, J. L., Greaves, L., and Repta, R. (2009). Better science with sex and gender: Facilitating the  
284 use of a sex and gender-based analysis in health research. *International Journal for Equity in Health*,  
285 8(1):14.
- 286 McDermott, N. J., Gandelman, R., and Reinisch, J. M. (1978). Contiguity to male fetuses influences  
287 ano-genital distance and time of vaginal opening in mice. *Physiology and Behavior*, 20(5):661–663.
- 288 Meisel, R. L. and Ward, I. L. (1981). Fetal female rats are masculinized by male littermates located  
289 caudally in the uterus. *Science*, 213(4504):239–242.
- 290 Miller, L. R., Marks, C., Becker, J. B., Hurn, P. D., Chen, W. J., Woodruff, T., McCarthy, M. M., Sohrabji,  
291 F., Schiebinger, L., Lee Wetherington, C., Makris, S., Arnold, A. P., Einstein, G., Miller, V. M.,  
292 Sandberg, K., Maier, S., Cornelison, T. L., and Clayton, J. A. (2017). Considering sex as a biological  
293 variable in preclinical research. *FASEB Journal*, 31(1):29–34.
- 294 Nagel, S. C. and vom Saal, F. S. (2004). Endocrine control of sexual differentiation: effects of the

- 295 maternal-fetal environment and endocrine disrupting chemicals. *Advances in Molecular and Cell*  
296 *Biology*, 34:15–37.
- 297 Padula, A. M. (2005). The freemartin syndrome: An update. *Animal Reproduction Science*, 87(1-2):93–  
298 109.
- 299 Quadagno, D. M., McQuitty, C., McKee, J., Koelliker, L., Wolfe, G., and Johnson, D. C. (1987). The  
300 effects of intrauterine position on competition and behavior in the mouse. *Physiology and Behavior*,  
301 41(6):639–642.
- 302 Roff, D. A., Wolak, M. E., Correa, L. A., and Soto-Gamboa, M. (2017). The phenotypic correlates and  
303 quantitative genetics of masculinization in the rodent, *Octodon degus*. *Heredity*.
- 304 Ryan, B. C. and Vandenbergh, J. G. (2002). Intrauterine position effects. *Neuroscience and Biobehavioral*  
305 *Reviews*, 26(6):665–678.
- 306 Santos, D. M., Rita, A. M., Casanellas, I., Ova, A. B., Araújo, I. M., Power, D., and Tiscornia, G. (2016).  
307 Ear wound regeneration in the African spiny mouse *Acomys cahirinus*. *Regeneration*, 3(1):52–61.
- 308 Seifert, A. W., Kiama, S. G., Seifert, M. G., Goheen, J. R., Palmer, T. M., and Maden, M. (2012). Skin  
309 shedding and tissue regeneration in African spiny mice (*Acomys*). *Nature*, 489(7417):561–5.
- 310 Vandenbergh, J. G. (1993). And brother begat nephew. *Nature*, 366(6439):671–672.
- 311 Vandenbergh, J. G. (2009). Effects of Intrauterine Position in Litter-Bearing Mammals. In *Maternal*  
312 *Effects in Mammals*, pages 203–226.
- 313 Vandenbergh, J. G. and Huggett, C. L. (1994). Mother’s prior intrauterine position affects the sex ratio of  
314 her offspring in house mice. *Proceedings of the National Academy of Sciences*, 91(23):11055–11059.
- 315 Vandenbergh, J. G. and Huggett, C. L. (1995). The anogenital distance index, a predictor of the intrauterine  
316 position effects on reproduction in female house mice. *Laboratory Animal Science*, 45(5):567–573.
- 317 vom Saal, F. S. (1981). Variation in phenotype due to random intrauterine positioning of male and female  
318 fetuses in rodents. *Journal of Reproduction and Fertility*, 62(2):633–650.
- 319 vom Saal, F. S. (1989). Sexual differentiation in litter-bearing mammals: influence of sex of adjacent  
320 fetuses in utero. *Journal of animal science*, 67(7):1824–1840.
- 321 vom Saal, F. S. and Bronson, F. H. (1980). Sexual characteristics of adult female mice are correlated with  
322 their blood testosterone levels during prenatal development. *Science*, 208(4444):597–9.
- 323 vom Saal, F. S., Clark, M. M., Galef, B. G., Drickamer, L. C., and Vandenbergh, J. G. (1999). Intrauterine  
324 position phenomenon. *Encyclopedia of Reproduction*, 2:893–900.
- 325 Vom Saal, F. S. and Dhar, M. G. (1992). Blood Flow in the Uterine Loop Artery and Loop Vein Is  
326 Bidirectional in the Mouse: Implications for Transport of Steroids Between Fetuses. *Physiology &*  
327 *Behavior*, 52:163–171.
- 328 vom Saal, F. S., Grant, W. M., McMullen, C. W., and Laves, K. S. (1983). High fetal estrogen concentra-  
329 tions: correlation with increased adult sexual activity and decreased aggression in male mice. *Science*,  
330 220(4603):1306–1309.
- 331 Weber, J. N., Peterson, B. K., and Hoekstra, H. E. (2013). Discrete genetic modules are responsible for  
332 complex burrow evolution in *Peromyscus* mice. *Nature*, 493(7432):402.
- 333 West, S., Reece, S., and Sheldon, B. (2002). Sex ratios. *Heredity*, 88:117–124.
- 334 West, S. A., Herre, E. A., and Sheldon, B. C. (2000). The Benefits of Allocating Sex. *Science*, 290(5490).
- 335 West, S. A. and Sheldon, B. C. (2002). Constraints in the Evolution of Sex Ratio Adjustment. *Science*,  
336 295(5560).
- 337 Wild, G. and West, S. A. (2007). A sex allocation theory for vertebrates: combining local resource  
338 competition and condition-dependent allocation. *The American Naturalist*, 170(5):E112–28.

339 **SUPPLEMENTAL DATA**

**Table 1.** Probabilities of 0, 1 or 2 neighbours of the opposite sex for *Case 1: Random Gender*.  $p$  is the probability that a randomly picked foetus is female and  $K$  is the number of foetuses in the horn of the uterus. On the left,  $p=0.5$ , reflecting a balanced sex ratio. On the right,  $p=0.3$ , reflecting a bias towards males.

| $K$ | $p = 0.5$  |            |            | $p = 0.3$  |            |            |
|-----|------------|------------|------------|------------|------------|------------|
|     | $P(X = 0)$ | $P(X = 1)$ | $P(X = 2)$ | $P(X = 0)$ | $P(X = 1)$ | $P(X = 2)$ |
| 2   | 0.5000     | 0.5000     | 0.0000     | 0.5800     | 0.4200     | 0.0000     |
| 3   | 0.4167     | 0.5000     | 0.0833     | 0.5100     | 0.4200     | 0.0700     |
| 4   | 0.3750     | 0.5000     | 0.1250     | 0.4750     | 0.4200     | 0.1050     |
| 5   | 0.3500     | 0.5000     | 0.1500     | 0.4540     | 0.4200     | 0.1260     |
| 6   | 0.3333     | 0.5000     | 0.1667     | 0.4400     | 0.4200     | 0.1400     |
| 7   | 0.3214     | 0.5000     | 0.1786     | 0.4300     | 0.4200     | 0.1500     |
| 8   | 0.3125     | 0.5000     | 0.1875     | 0.4225     | 0.4200     | 0.1575     |
| 9   | 0.3056     | 0.5000     | 0.1944     | 0.4167     | 0.4200     | 0.1633     |
| 10  | 0.3000     | 0.5000     | 0.2000     | 0.4120     | 0.4200     | 0.1680     |
| 11  | 0.2955     | 0.5000     | 0.2045     | 0.4082     | 0.4200     | 0.1718     |
| 12  | 0.2917     | 0.5000     | 0.2083     | 0.4050     | 0.4200     | 0.1750     |
| 13  | 0.2885     | 0.5000     | 0.2115     | 0.4023     | 0.4200     | 0.1777     |
| 14  | 0.2857     | 0.5000     | 0.2143     | 0.4000     | 0.4200     | 0.1800     |
| 15  | 0.2833     | 0.5000     | 0.2167     | 0.3980     | 0.4200     | 0.1820     |
| 16  | 0.2813     | 0.5000     | 0.2188     | 0.3962     | 0.4200     | 0.1838     |
| 17  | 0.2794     | 0.5000     | 0.2206     | 0.3947     | 0.4200     | 0.1853     |
| 18  | 0.2778     | 0.5000     | 0.2222     | 0.3933     | 0.4200     | 0.1867     |
| 19  | 0.2763     | 0.5000     | 0.2237     | 0.3921     | 0.4200     | 0.1879     |
| 20  | 0.2750     | 0.5000     | 0.2250     | 0.3910     | 0.4200     | 0.1890     |
| 50  | 0.2738     | 0.5000     | 0.2262     | 0.3900     | 0.4200     | 0.1900     |
| 100 | 0.2727     | 0.5000     | 0.2273     | 0.3891     | 0.4200     | 0.1909     |

**Table 2.** Probabilities of 0, 1 or 2 neighbours of the opposite sex for *Case 2: Fixed Gender*.  $n$  is the number of female foetuses from a total of  $K$  foetuses in the horn of the uterus. On the left,  $n=K/2$  (i.e. a balanced gender ratio), and so the total number of foetuses in the horn must be even. On the right, the number of females ( $n=3$ ) does not change as the total number of foetuses in the uterine horn increases.

| $K$ | $n = \frac{K}{2}$ |            |            | $n = 3$    |            |            |
|-----|-------------------|------------|------------|------------|------------|------------|
|     | $P(X = 0)$        | $P(X = 1)$ | $P(X = 2)$ | $P(X = 0)$ | $P(X = 1)$ | $P(X = 2)$ |
| 2   | 0.0000            | 1.0000     | 0.0000     | –          | –          | –          |
|     | –                 | –          | –          | 1.0000     | 0.0000     | 0.0000     |
| 4   | 0.1667            | 0.6667     | 0.1667     | 0.3750     | 0.5000     | 0.1250     |
|     | –                 | –          | –          | 0.2200     | 0.6000     | 0.1800     |
| 6   | 0.2000            | 0.6000     | 0.2000     | 0.2000     | 0.6000     | 0.2000     |
|     | –                 | –          | –          | 0.2245     | 0.5714     | 0.2041     |
| 8   | 0.2143            | 0.5714     | 0.2143     | 0.2634     | 0.5357     | 0.2009     |
|     | –                 | –          | –          | 0.3056     | 0.5000     | 0.1944     |
| 10  | 0.2222            | 0.5556     | 0.2222     | 0.3467     | 0.4667     | 0.1867     |
|     | –                 | –          | –          | 0.3851     | 0.4364     | 0.1785     |
| 12  | 0.2273            | 0.5455     | 0.2273     | 0.4205     | 0.4091     | 0.1705     |
|     | –                 | –          | –          | 0.4527     | 0.3846     | 0.1627     |
| 14  | 0.2308            | 0.5385     | 0.2308     | 0.4819     | 0.3626     | 0.1554     |
|     | –                 | –          | –          | 0.5086     | 0.3429     | 0.1486     |
| 16  | 0.2333            | 0.5333     | 0.2333     | 0.5328     | 0.3250     | 0.1422     |
|     | –                 | –          | –          | 0.5549     | 0.3088     | 0.1362     |
| 18  | 0.2353            | 0.5294     | 0.2353     | 0.5752     | 0.2941     | 0.1307     |
|     | –                 | –          | –          | 0.5937     | 0.2807     | 0.1256     |
| 20  | 0.2368            | 0.5263     | 0.2368     | 0.6108     | 0.2684     | 0.1208     |
|     | –                 | –          | –          | 0.8296     | 0.1151     | 0.0552     |
| 100 | 0.2475            | 0.5051     | 0.2475     | 0.9124     | 0.0588     | 0.0288     |
